# Supplementary material
Source: PubMed Central journal article supplement (PMC5042809)
Supplement: NIHMS775744-supplement-1.pdf [file NIHMS775744-supplement-1.pdf]

Supplement Table. Adjusted\* General Linear Model to Compare The Impact of Metformin on PSA, BMI and LDL between Race/Ethnicity Groups

|              | NHW      |       |       | AA vs. NHW |       |       | Hispanic vs. NHW |       |       |
|--------------|----------|-------|-------|------------|-------|-------|------------------|-------|-------|
|              | Estimate | SE    | P     | Estimate   | SE    | P     | Estimate         | SE    | P     |
| PSA          | 0.094    | 0.278 | 0.734 | -1.739     | 0.623 | 0.005 | 0.498            | 0.927 | 0.592 |
| $\Delta$ BMI | -0.381   | 0.030 | <.001 | 0.243      | 0.070 | 0.001 | 0.020            | 0.106 | 0.853 |
| $\Delta$ LDL | -1.192   | 0.184 | <.001 | -2.114     | 0.422 | <.001 | -3.699           | 0.631 | <.001 |

\*The adjustments include covariates: age, HbA1c, Charlson comorbidity, finasteride use, and statin use, and propensity scores for metformin use.
